# Supplementary figures and images for: Antimicrobial Resistance and Genomic Characterization of Salmonella Infantis from Different Sources
Source: MDPI journal article supplement (doi:10.3390/ijms24065492), 2023-03-13

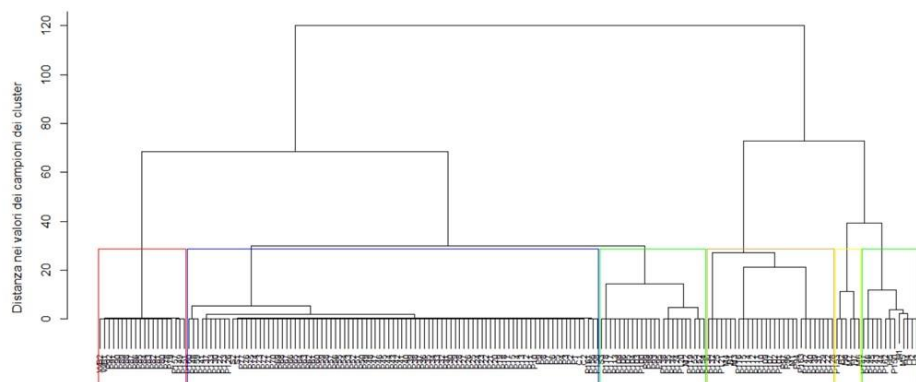

Figure S1: Dendrogram deduces from cluster analysis of the 185 *S. Infantis* strains.

Supplement: s1 [file s1]
